# Supplementary material
Source: PubMed Central journal article supplement (PMC3648036)
Supplement: AEM.00254-13_zam999104412so3.pdf [file AEM.00254-13_zam999104412so3.pdf]

Table S1: List of barcode tags used to demultiplex the pyrosequencing library

| <i>Sample ID</i> | <i>Barcode</i> |
|------------------|----------------|
| DIS-NDW          | CTATAT         |
| DIS-BWI          | CTATCA         |
| DIS-LCL          | CTACTG         |
| ATL-NDW          | TGATAT         |
| ATL-BWI          | TGATCA         |
| ATL-UCL1         | TGACTG         |
| ATL-UCL2         | TGACAC         |
| ATL-LCL          | TGAGCG         |



Table S3: Pearson correlation between the alpha-diversity metrics

|                  | <i>Bacteria</i> |                  |         |         | <i>Archaea</i> |                  |         |         |
|------------------|-----------------|------------------|---------|---------|----------------|------------------|---------|---------|
|                  | Chao1           | Observed Species | Shannon | Simpson | Chao1          | Observed Species | Shannon | Simpson |
| Chao1            | 1               |                  |         |         | 1              |                  |         |         |
| Observed Species | 0.97            | 1                |         |         | 0.95           | 1                |         |         |
| Shannon          | 0.64            | 0.57             | 1       |         | -0.03          | -0.09            | 1       |         |
| Simpson          | 0.40            | 0.32             | 0.93    | 1       | -0.21          | -0.26            | 0.97    | 1       |

Table S4: Marginal effects and conditional effects of the environmental factors as per their ability to explain variation in the bacterial genera. LambdaA is the amount of variance explained. P is the probability value and F refers to the F statistics. a) The marginal effect refers to the amount of variation explained by the respective parameter independent of other factors b) whereas the conditional effect refers to the variation explained after other parameters are added in the order of the variable column.

| Marginal Effects |         | Conditional Effects |       |      |
|------------------|---------|---------------------|-------|------|
| Variable         | Lambda1 | LambdaA             | P     | F    |
| Temperature      | 0.35    | 0.35                | 0.008 | 3.27 |
| Salinity         | 0.32    | 0.09                | 0.474 | 0.75 |
| SO4              | 0.32    | 0.12                | 0.37  | 1.15 |
| Mn               | 0.22    | 0.23                | 0.106 | 3.35 |
| Si               | 0.19    | 0.08                | 0.404 | 1.12 |

Table S5: Output from the DCA analysis generated using CANOCO for Windows showing variance explained by the first four axis. The length of the gradient is below 3 and so a linear model (RDA analysis) is more appropriate.

|                                  |                                 | <i>Bacteria</i> |       |       |       | <i>Archaea</i> |       |       |       |
|----------------------------------|---------------------------------|-----------------|-------|-------|-------|----------------|-------|-------|-------|
| Axes                             |                                 | 1               | 2     | 3     | 4     | 1              | 2     | 3     | 4     |
| Eigenvalues                      |                                 | 0.448           | 0.219 | 0.016 | 0.009 | 0.442          | 0.154 | 0.017 | 0.007 |
| Lengths of gradient              |                                 | 1.749           | 2.11  | 0.493 | 0.416 | 1.946          | 1.066 | 0.577 | 0.646 |
| Species-environment correlations |                                 | 1               | 0.939 | 0.659 | 0.878 | 1              | 0.999 | 0.997 | 0.992 |
| Cumulative percentage variance   | of species data                 | 34.8            | 51.9  | 53.1  | 53.8  | 33.2           | 44.8  | 46.1  | 46.6  |
|                                  | of species-environment relation | 44.4            | 62.9  | 0     | 0     | 31             | 41    | 0     | 0     |
