# Supplementary material
Source: PubMed Central journal article supplement (PMC3648036)

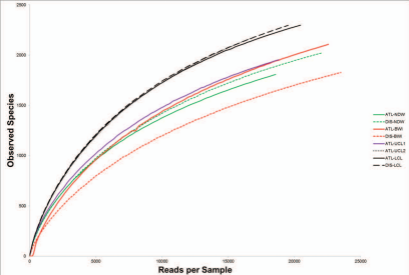

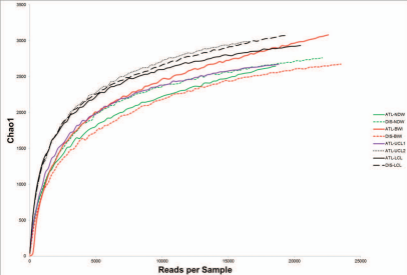

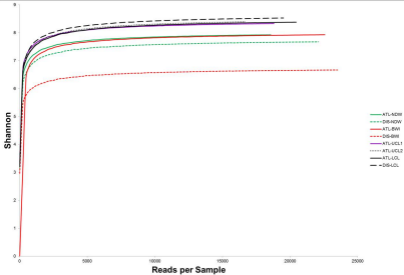

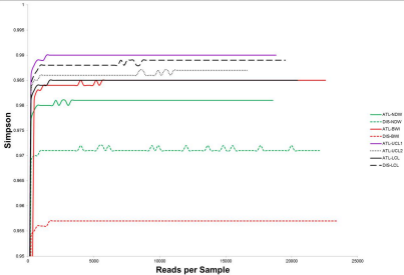

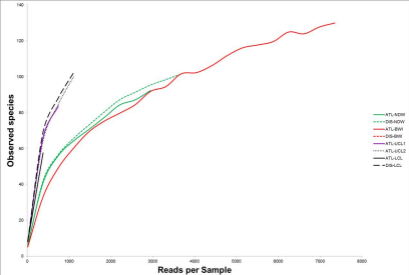

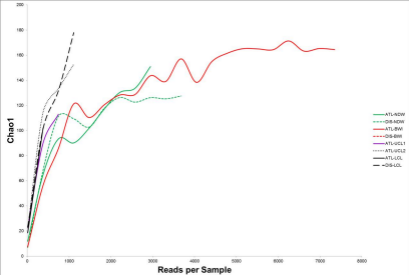

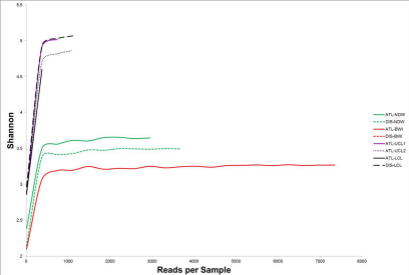

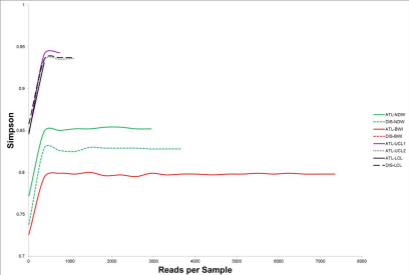



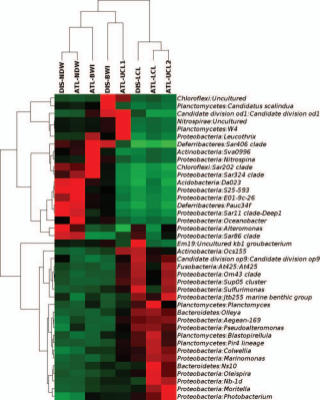

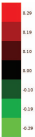



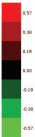

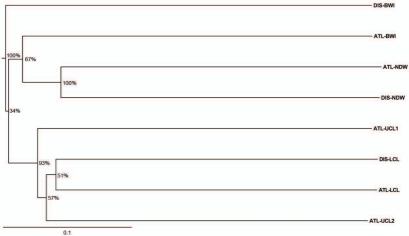

### PCoA - PC1 vs PC2

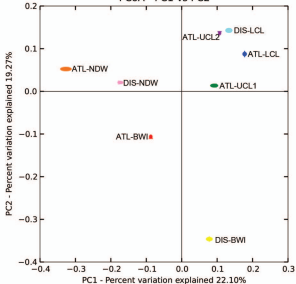

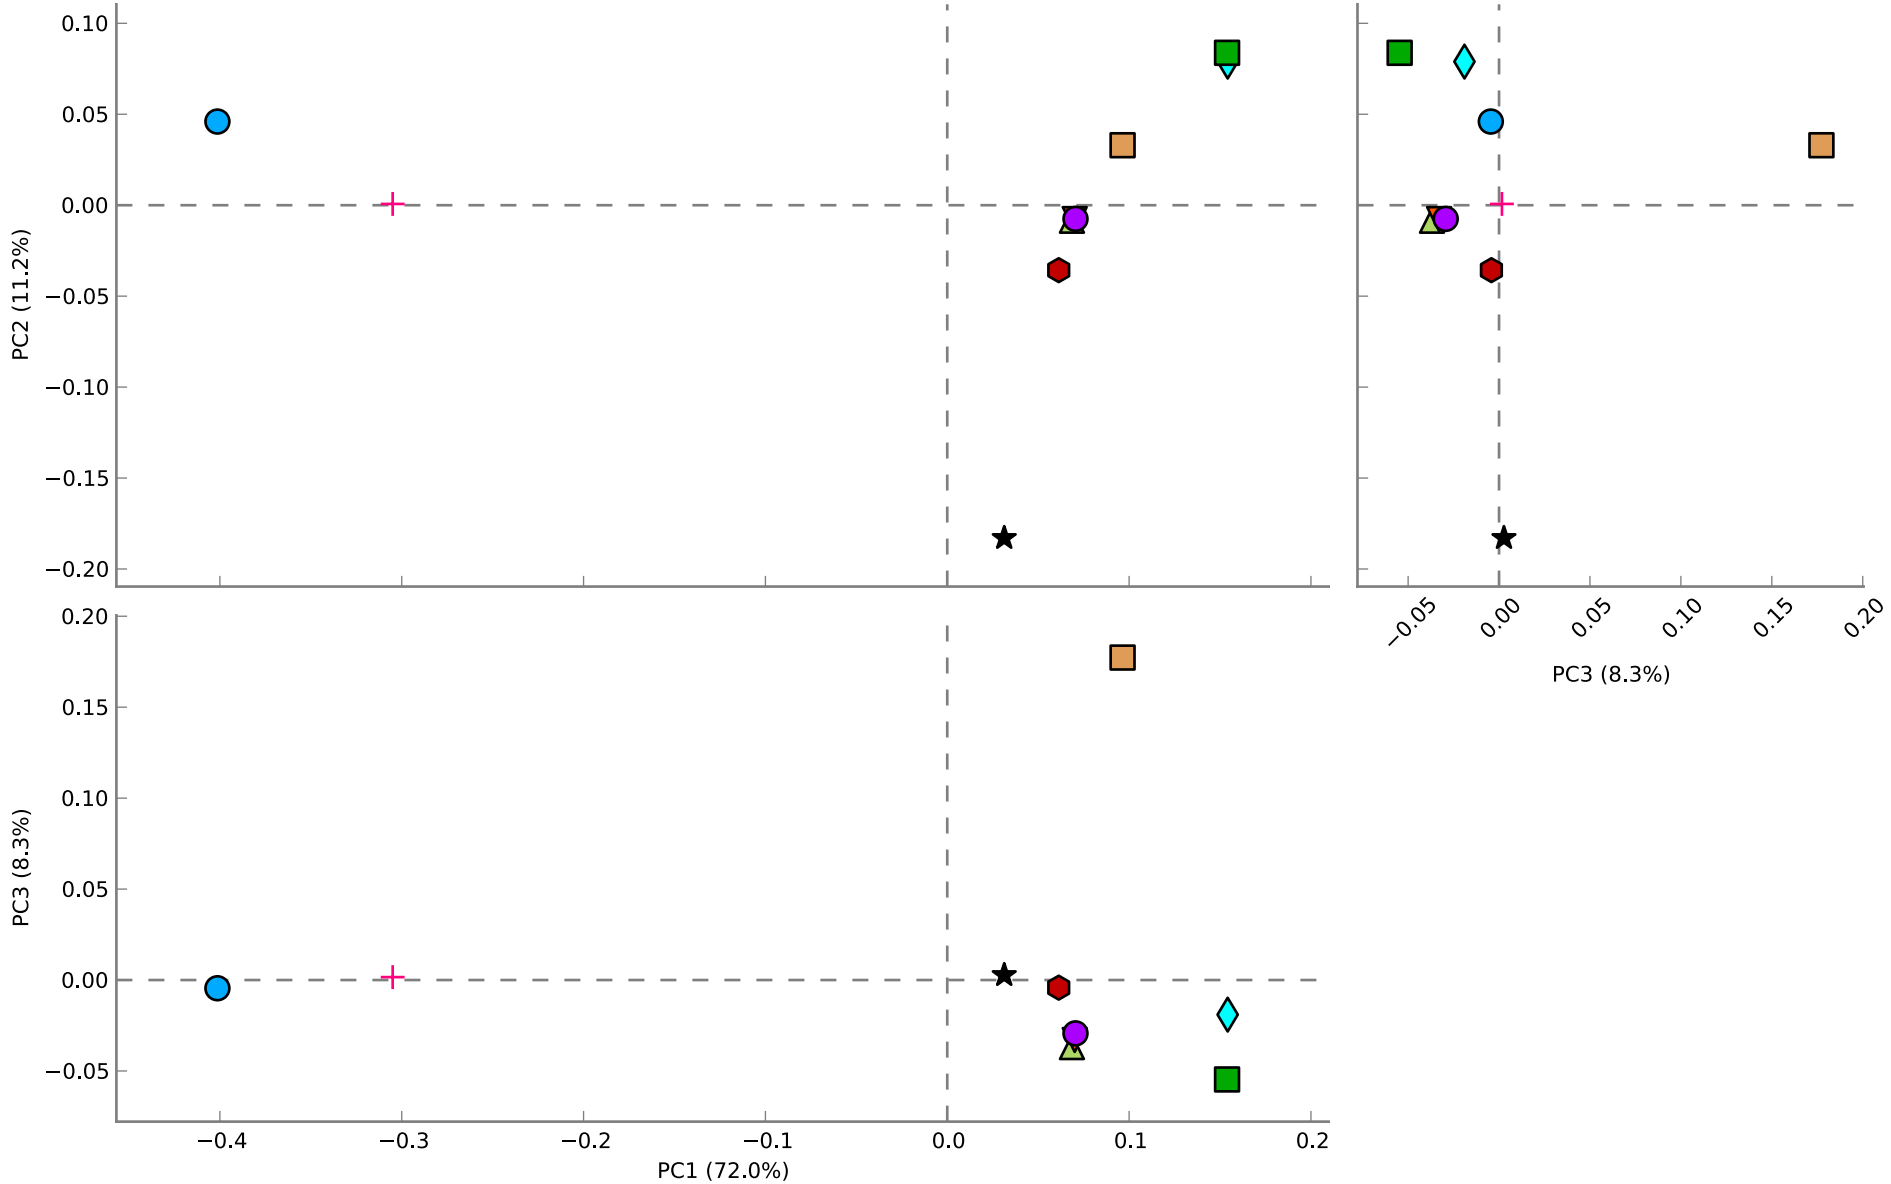

- ABP-Meta
- + DBP-Meta
- ◇ ATL-NDW
- ATL-BWI
- ⬡ ATL-UCL1
- ▼ ATL-UCL2
- ▲ ATL-LCL
- DIS-NDW
- ★ DIS-BWI
- DIS-LCL





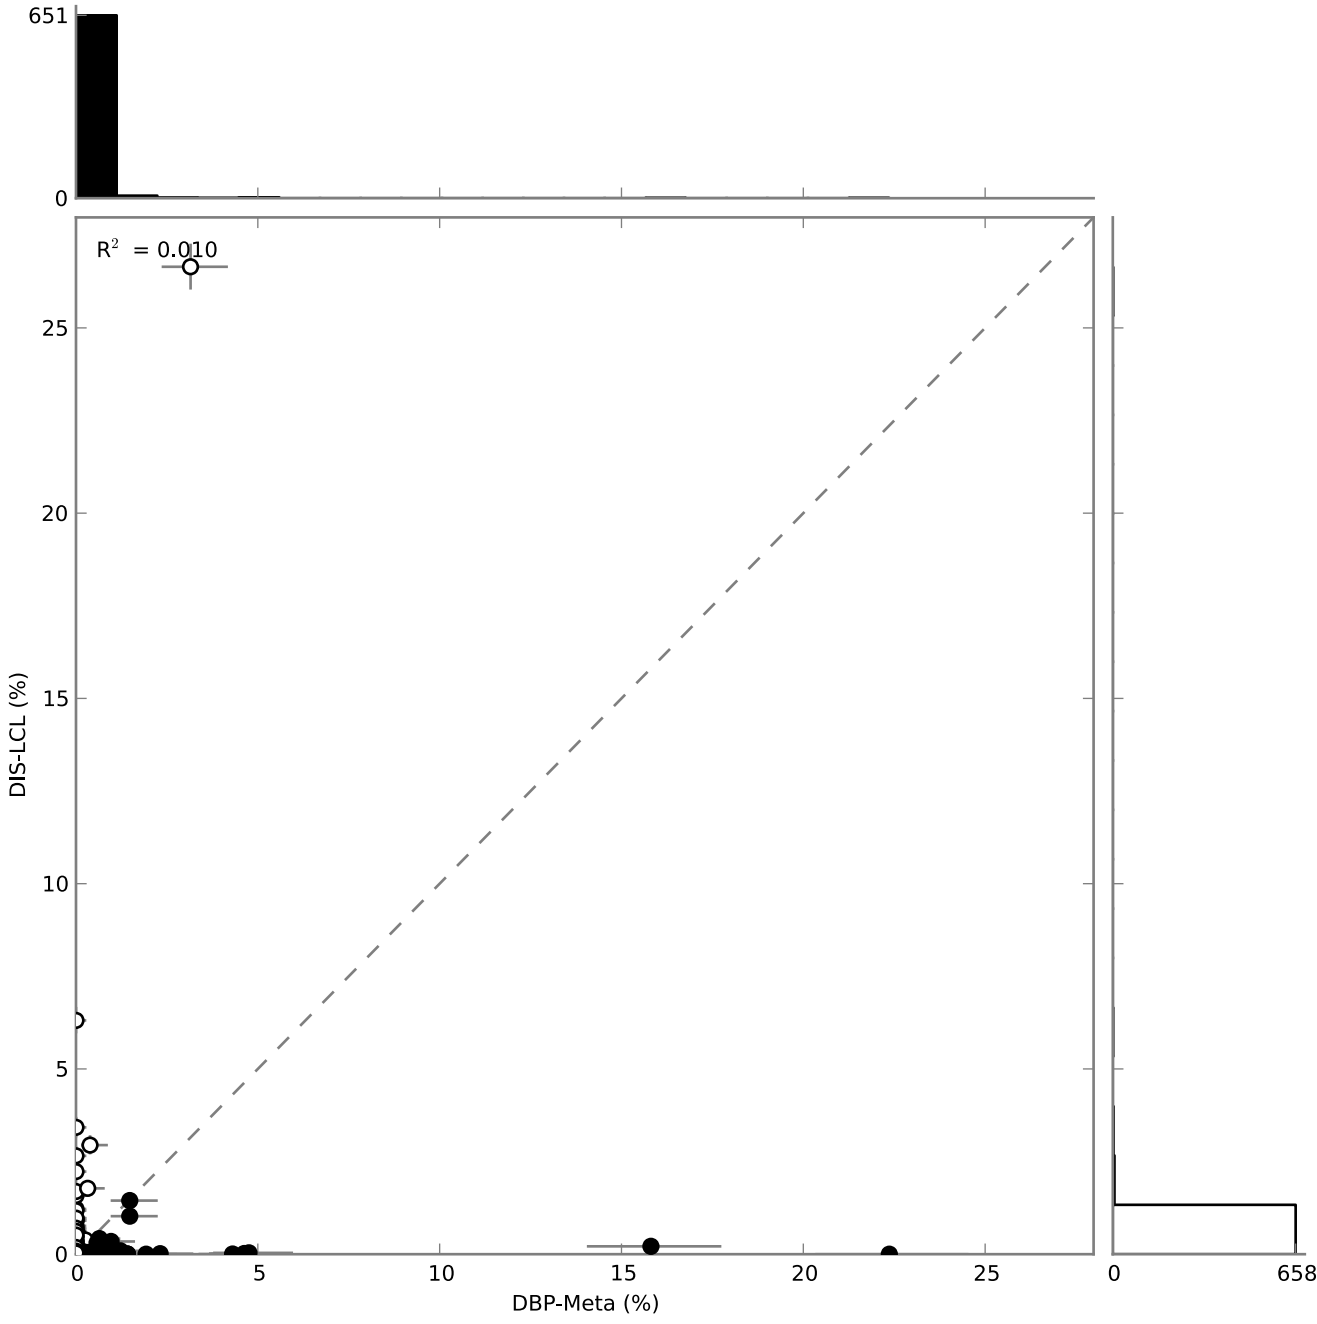

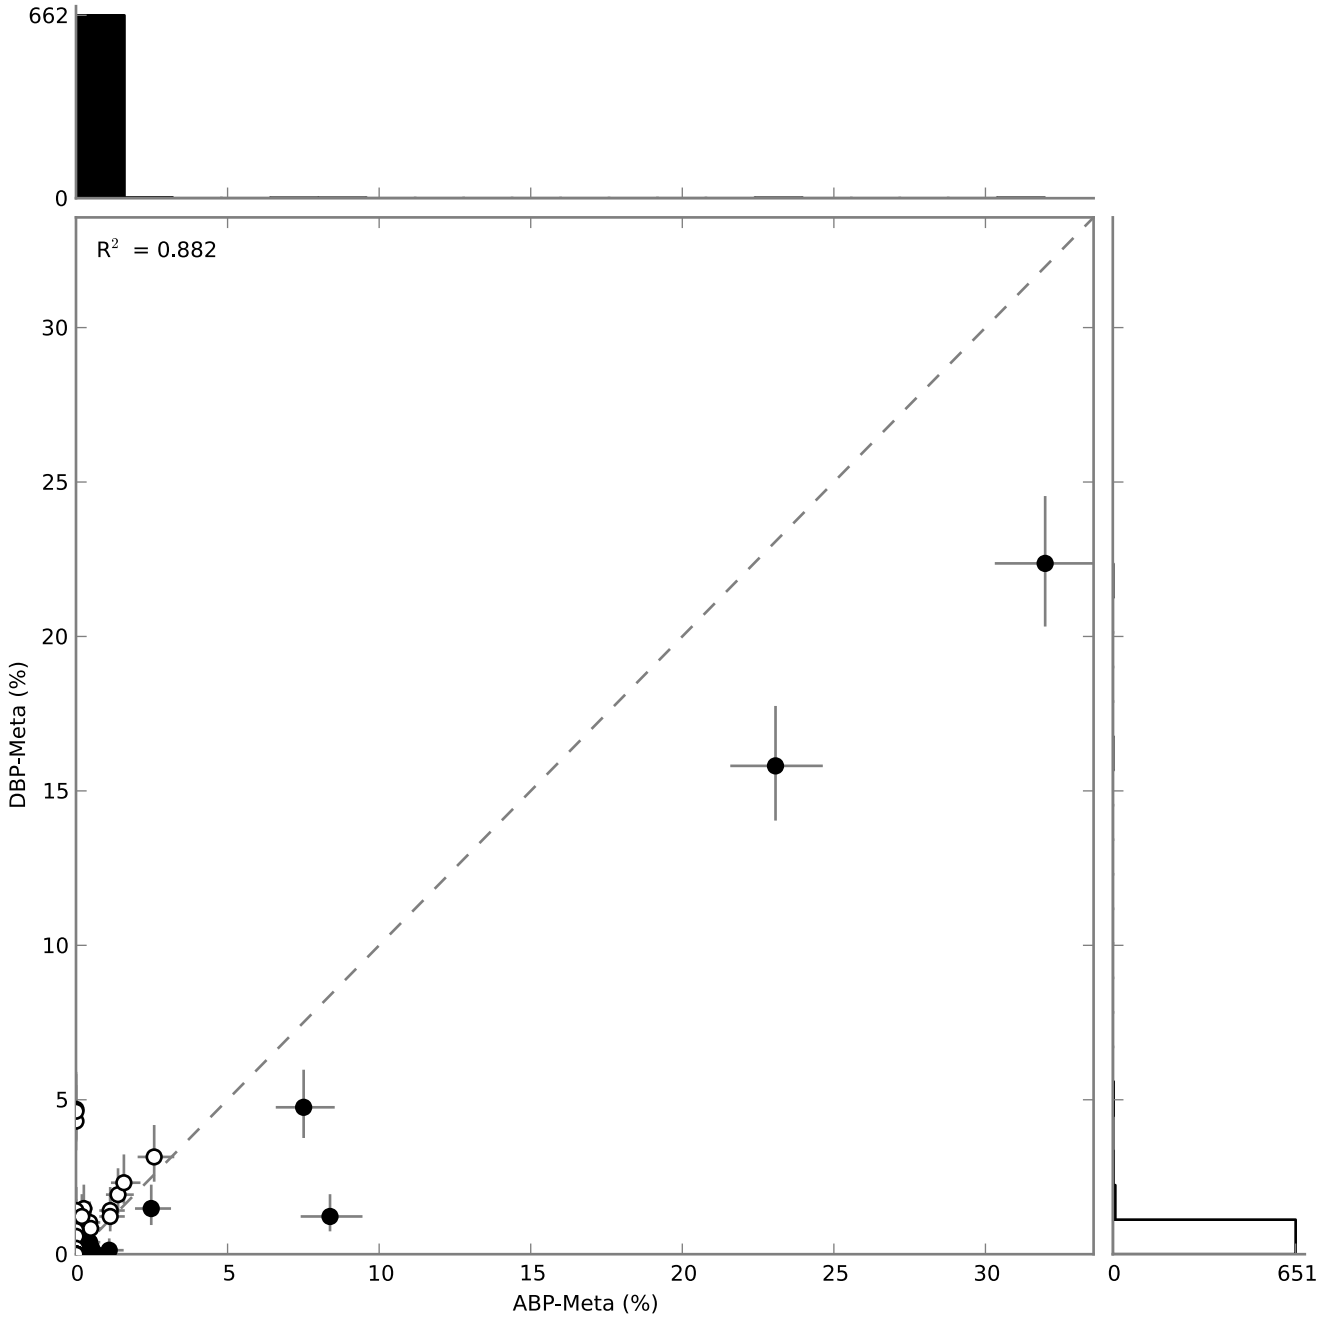

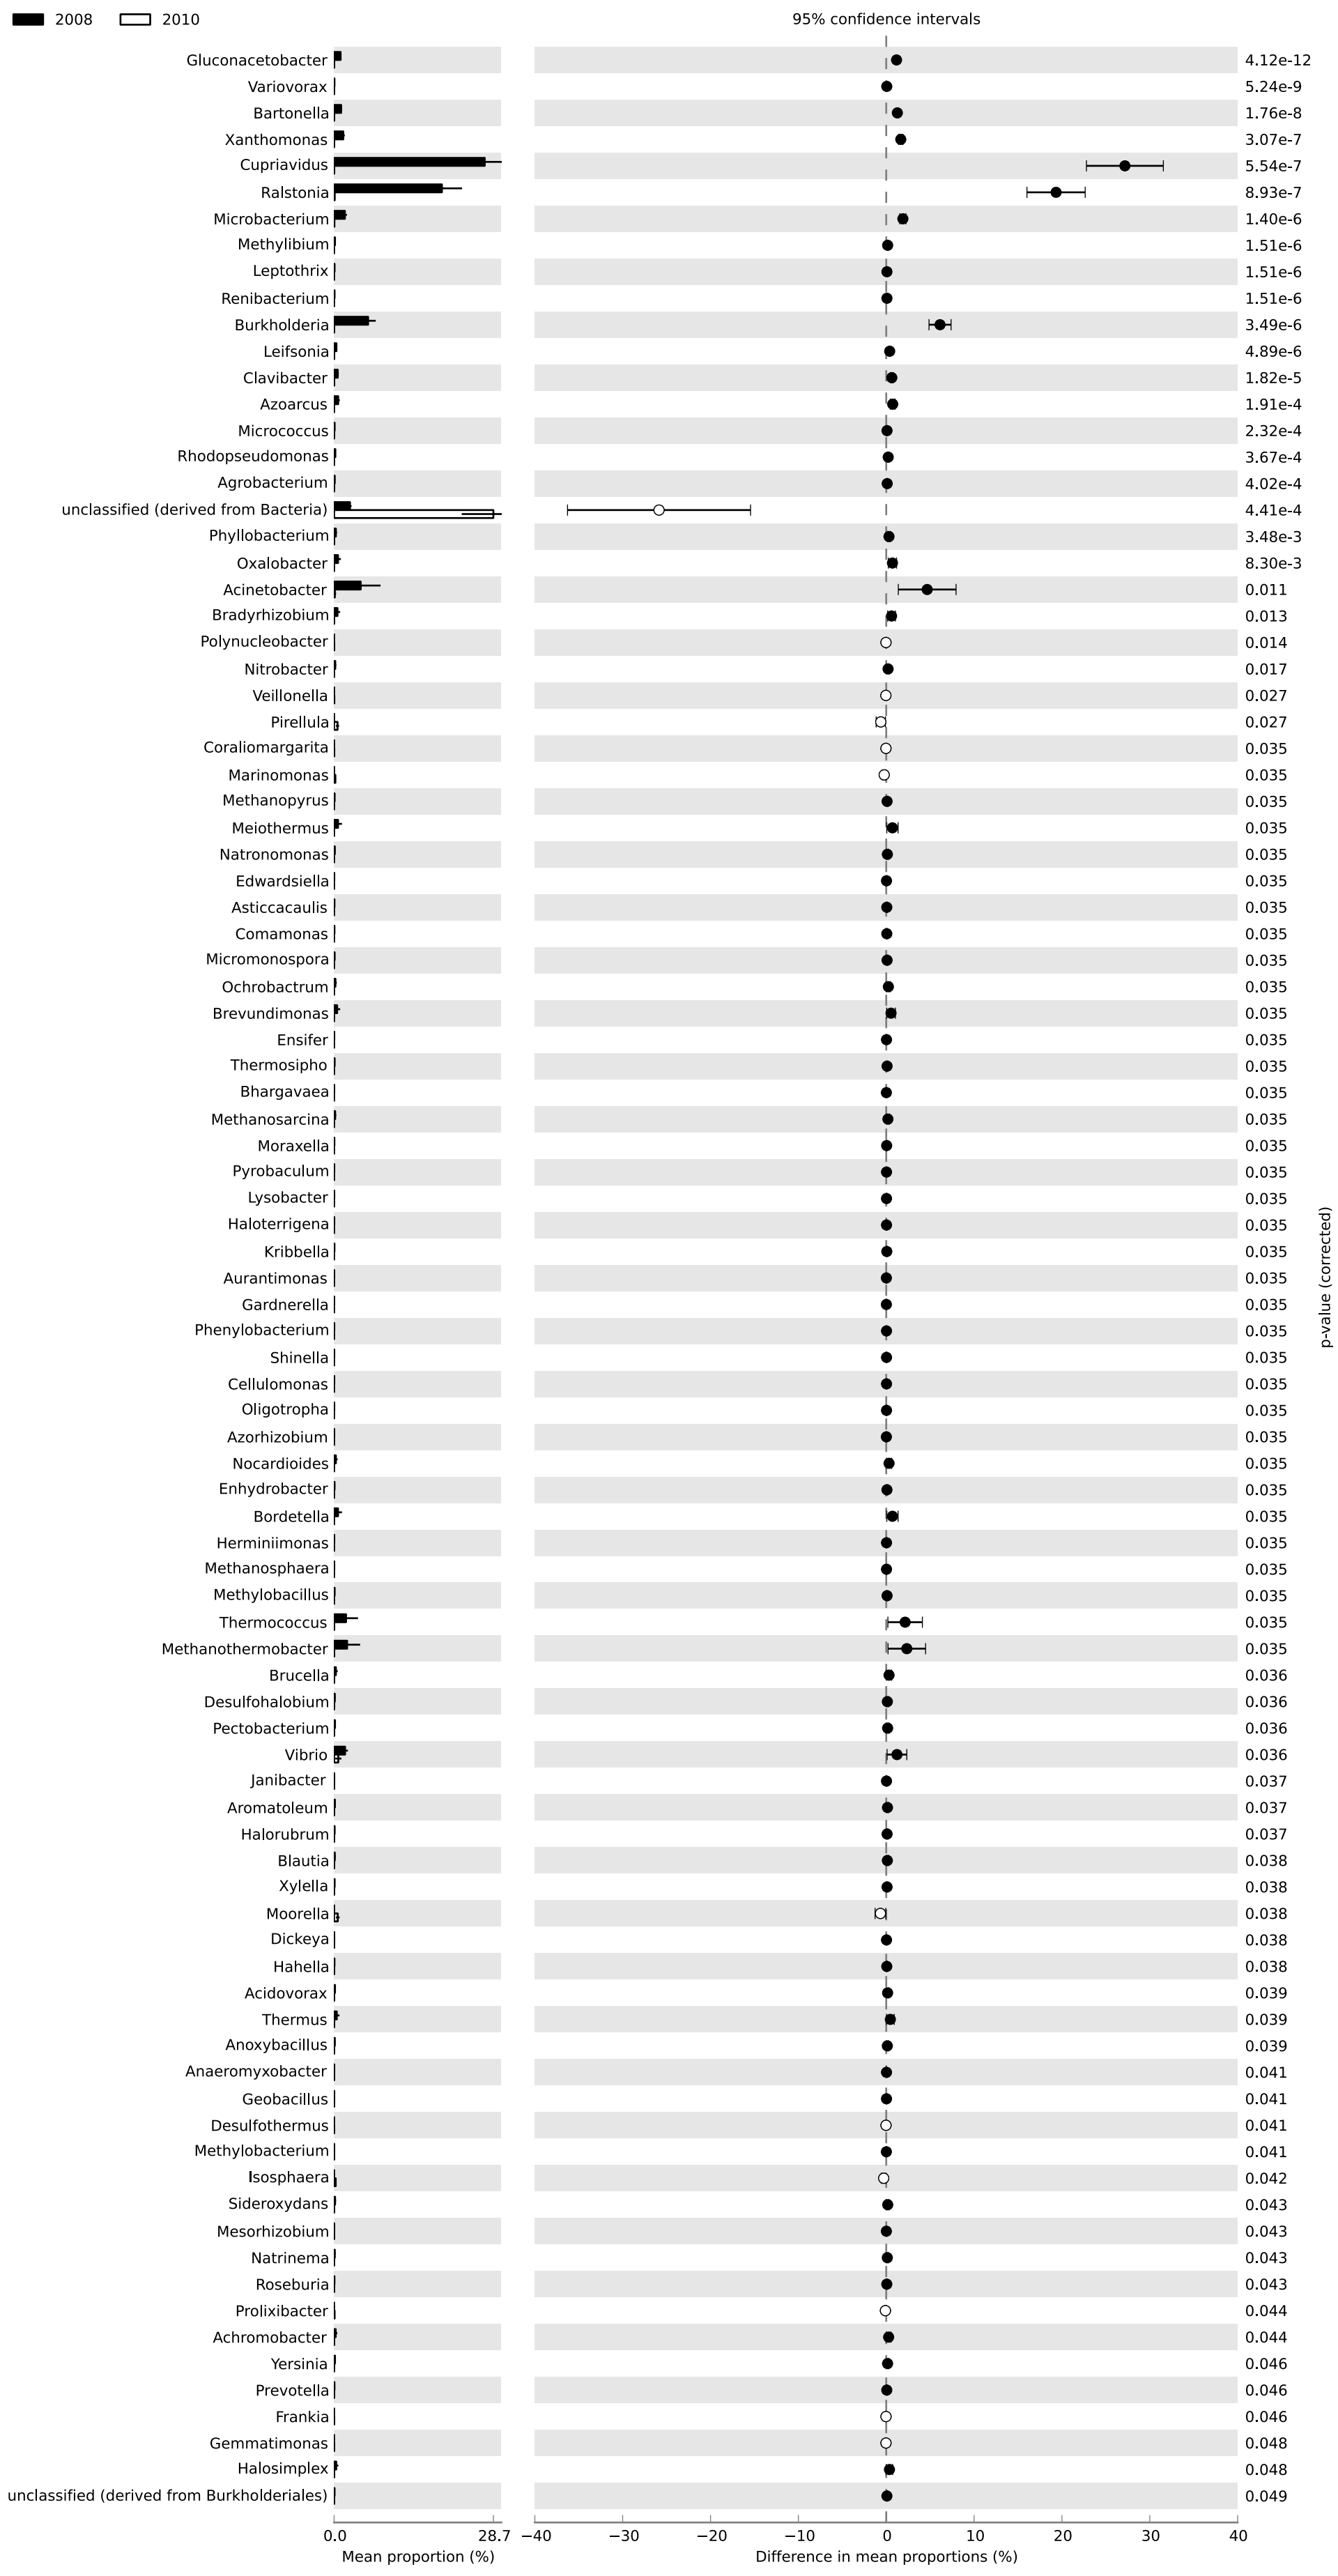

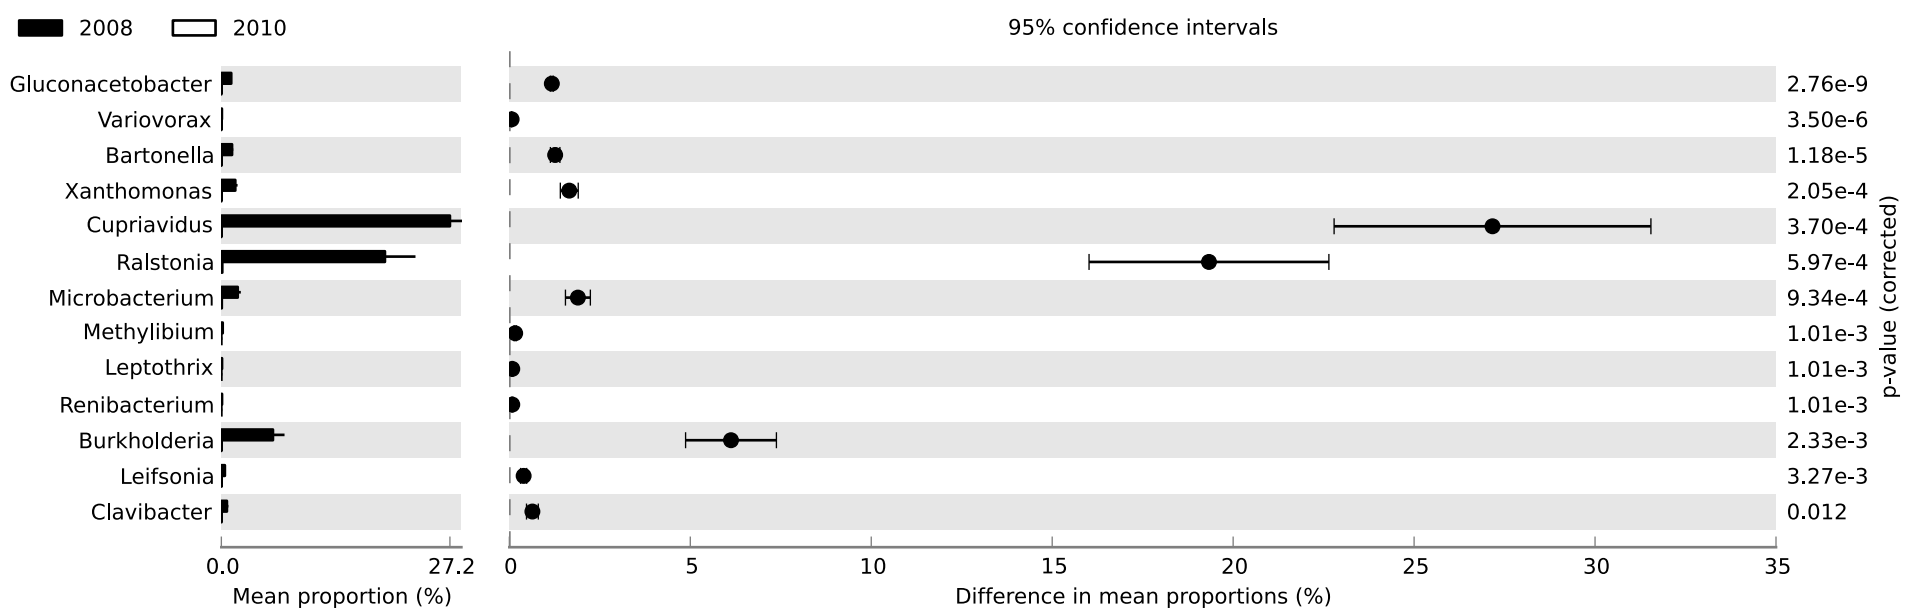

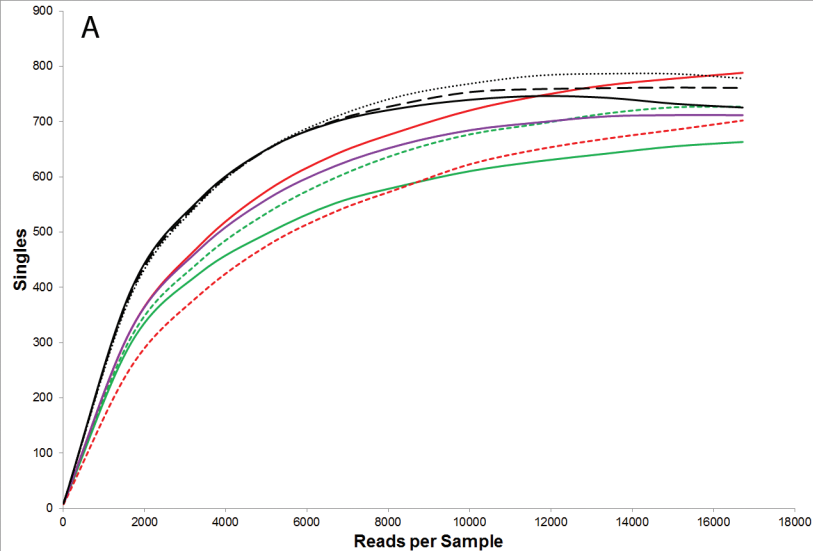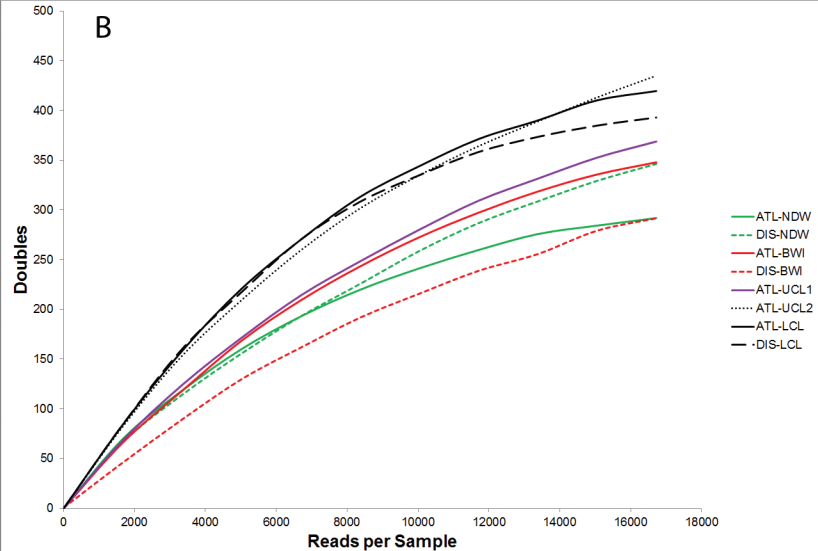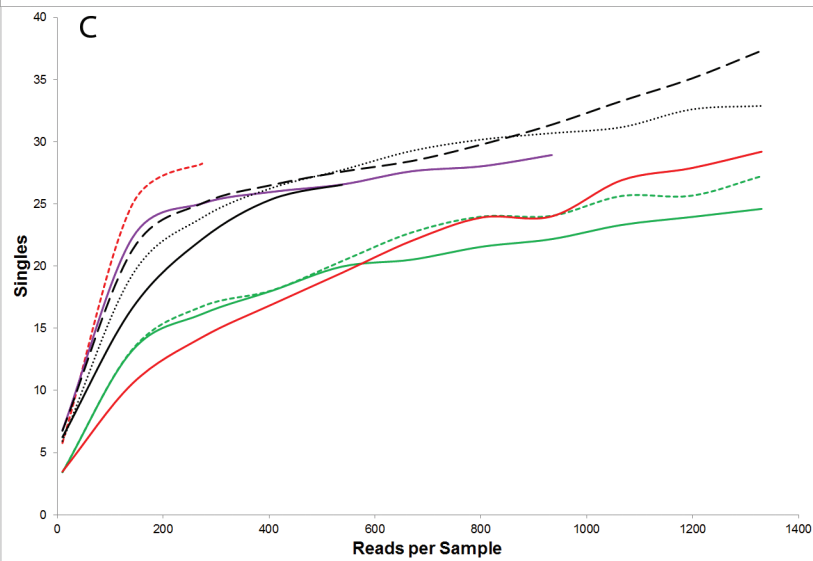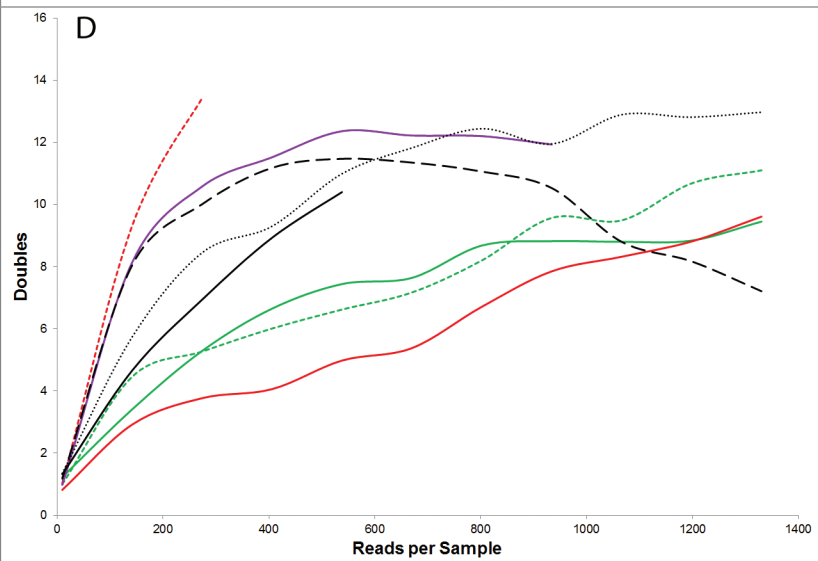

Supplement: AEM.00254-13_zam999104412so2.pdf [file AEM.00254-13_zam999104412so2.pdf]
